# Supplementary material for: A high-content EMT screen identifies multiple receptor tyrosine kinase inhibitors with activity on TGFβ receptor
Source: PubMed Central journal article supplement (PMC5041959; doi:10.18632/oncotarget.8418), 2016-03-27
Supplement: oncotarget-07-25983-s001.pdf [file oncotarget-07-25983-s001.pdf]

## A high-content EMT screen identifies multiple receptor tyrosine kinase inhibitors with activity on TGF $\beta$ receptor

### Supplementary Materials

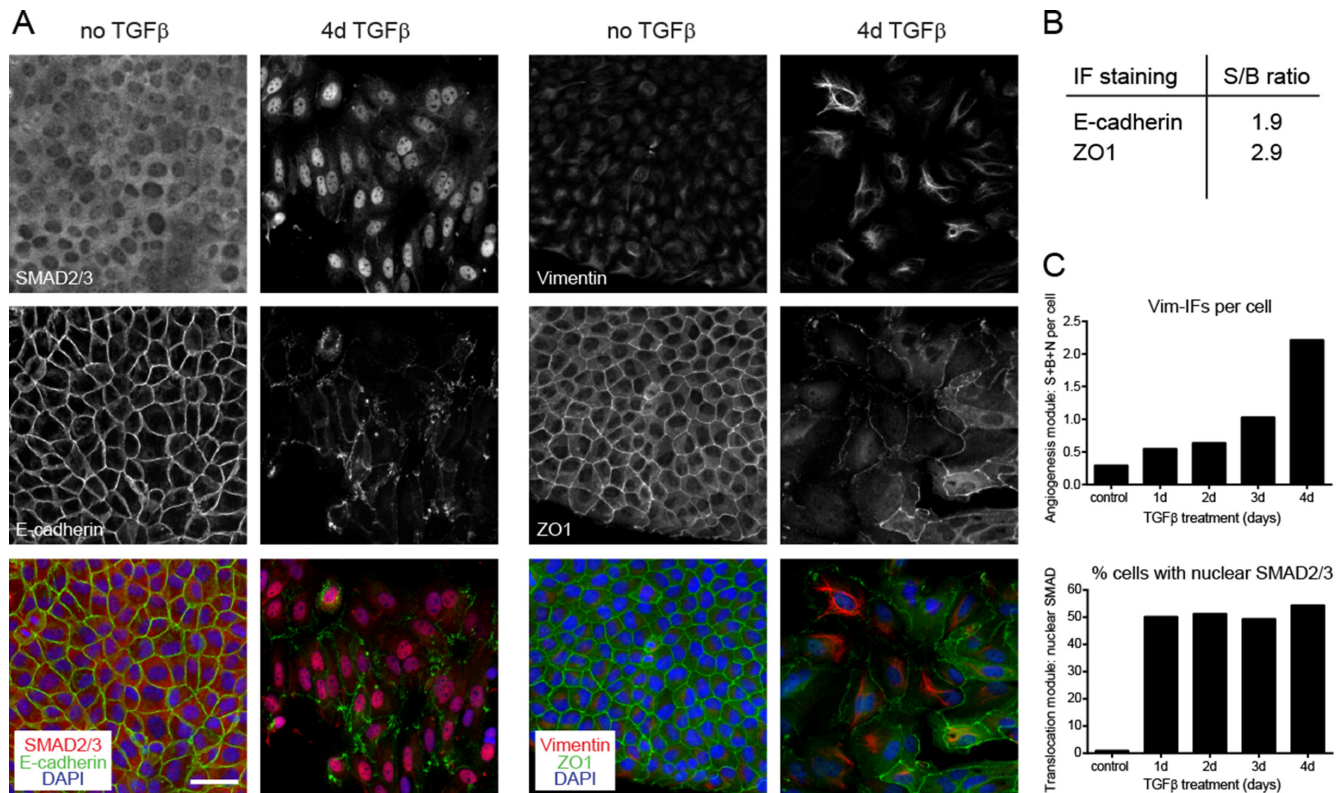

**Supplementary Figure S1: Assessment of additional markers of EMT as screening readouts.** (A) NMuMG cells were treated for four days with or without TGF $\beta$ , and the nuclear translocation of SMAD2/3 as a consequence of TGFBR activation as well as the dissolution of E-cadherin-positive adherens junctions was followed by immunofluorescence staining with specific antibodies. Vimentin was used to stain intermediate filaments and ZO1 as an epithelial marker for tight junctions. The cells were counterstained with DAPI to visualize nuclei. Scale bar, 100  $\mu$ m. (B) Signal-to-background (S/B) ratio of E-cadherin and ZO1 immunofluorescence (IF) staining was quantified from epithelial NMuMG cells in the absence of TGF $\beta$ . Note that such low S/B ratios hamper adequate image segmentation, and no screening window between the epithelial membrane localization and the mesenchymal disintegration of these junctions was obtained in this screening setup. (C) NMuMG cells were treated with TGF $\beta$  for 1, 2, 3, 4 days or left untreated. The appearance of vimentin-positive intermediate filaments (Vim-IFs) per cell and the percent of cells with nuclear SMAD2/3 translocation was quantified from immunostainings with MetaXpress software. While the increase of Vim-IFs after four days of TGF $\beta$  treatment compared to untreated controls was significantly lower than the deposition of fibronectin (see Figure 1), nuclear translocation of SMAD2/3 occurred very early and as a readout would restrict the screening hits to compounds directly acting on the immediate effects of TGFBR activation by TGF $\beta$  instead of capturing the process of EMT as a whole.

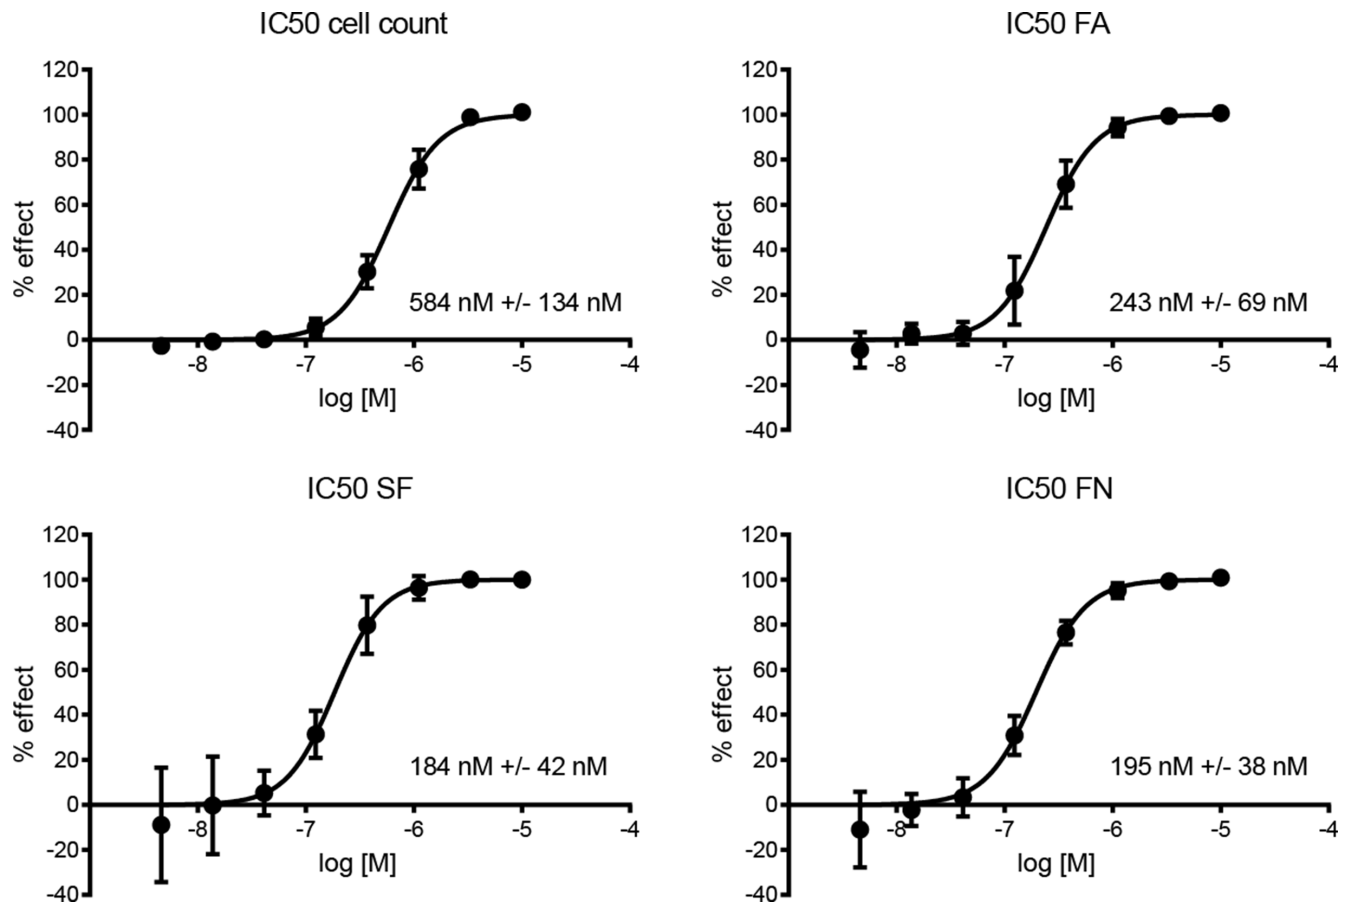

**Supplementary Figure S2: Dose-dependent effect of the TGFBR inhibitor SB-431542 on the different screening readouts.** Dose-response curves for the treatment of NMuMG cells with TGF $\beta$  and different concentrations of the TGFBR inhibitor SB-431542 for four days. Plotted are the log concentration values of the inhibitor (M, molar) against % effect on cell count, focal adhesion formation (FA), remodeling to stress fibers (SF) and fibronectin deposition (FN) relative to DMSO controls. IC50 values with their standard deviations are reported on the lower right of the graphs.

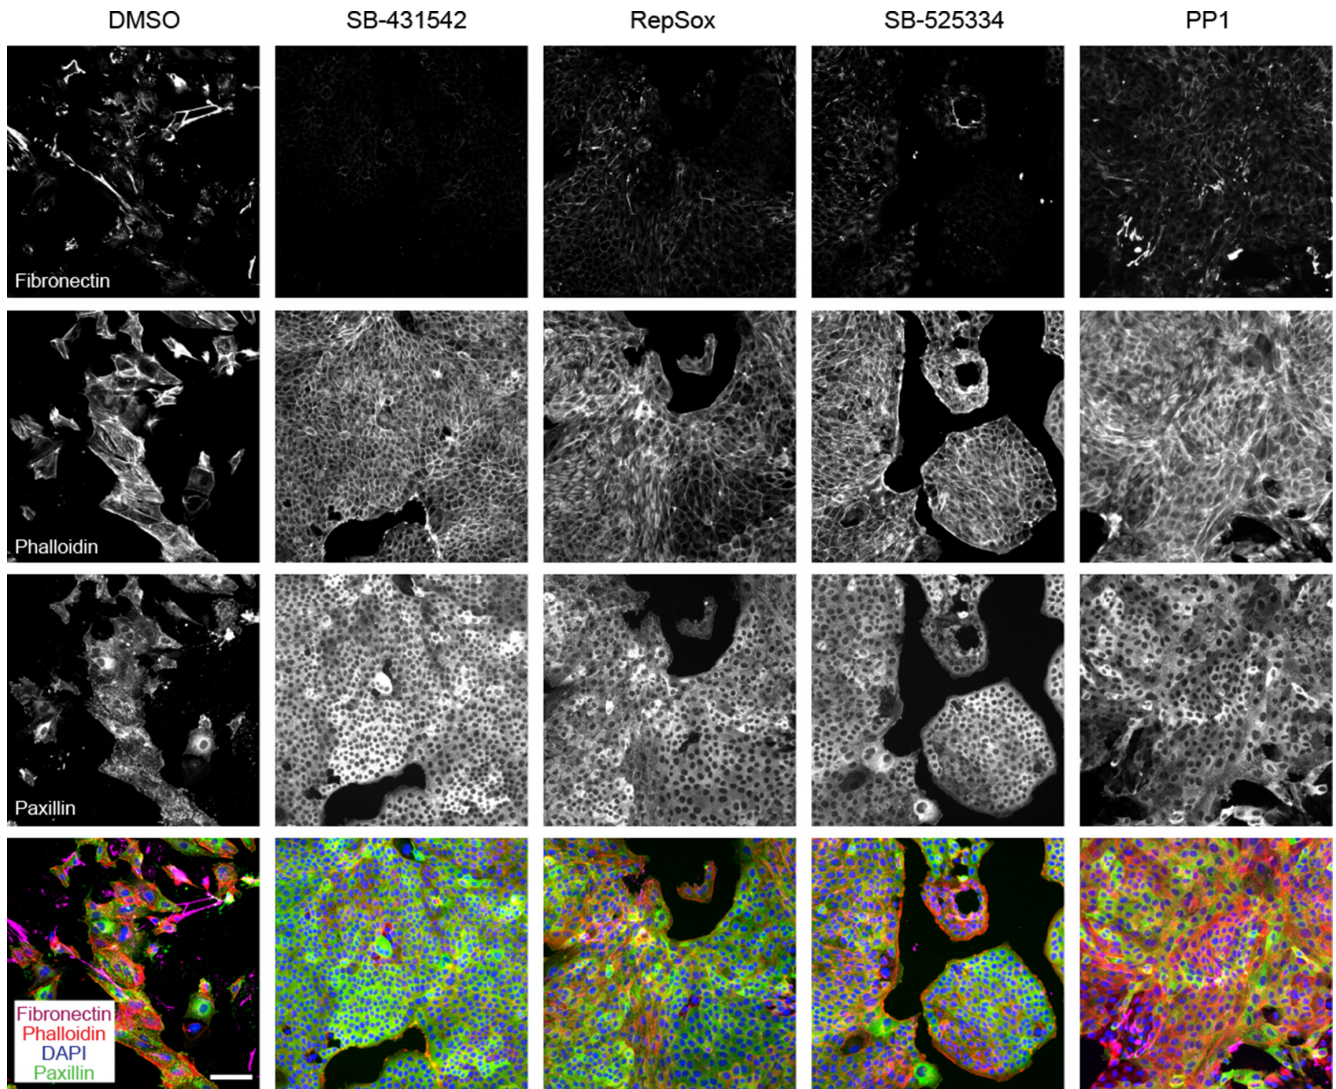

**Supplementary Figure S3: NMuMG cells treated with compounds with reported activity on TGFBR stay epithelial as judged by the screening readouts.** NMuMG cells were treated and stained as described in Figure 3A. SB-431542 was used at 10  $\mu$ M, RepSox at 0.1  $\mu$ M, SB-525334 at 1  $\mu$ M and PP1 at 3  $\mu$ M concentration. Scale bar, 100  $\mu$ m.



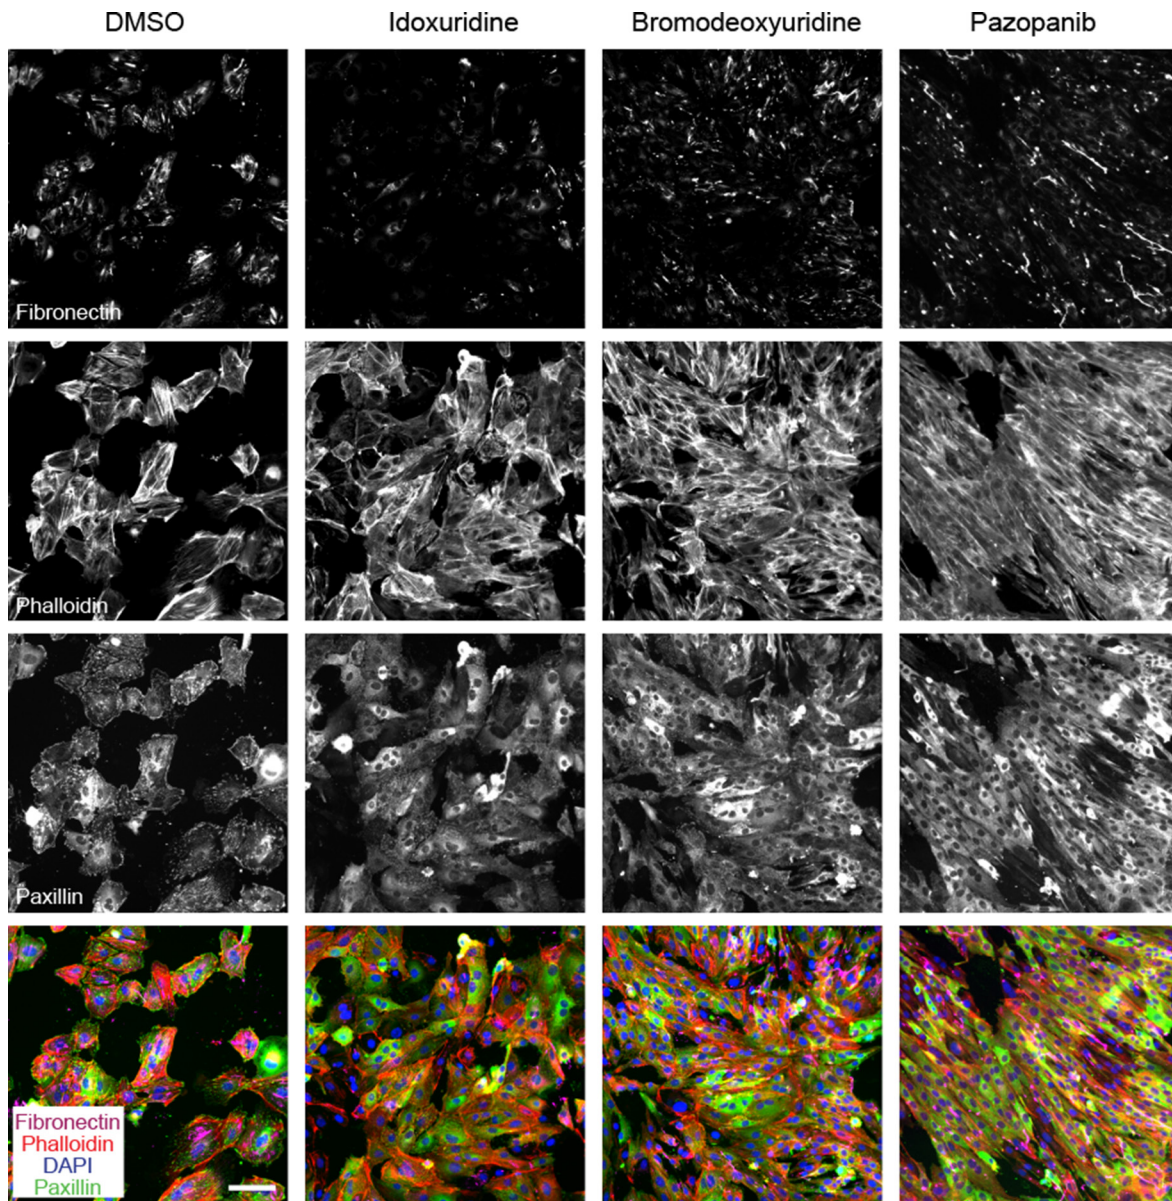

**Supplementary Figure S4: Uridine analogues and pazopanib inhibit EMT progression.** NMuMG cells were treated and stained as described in Figure 3A. Idoxuridine was used at 3  $\mu$ M, 5-bromo-2'-deoxyuridine at 1  $\mu$ M and pazopanib at 8  $\mu$ M concentration. Scale bar, 100  $\mu$ m.

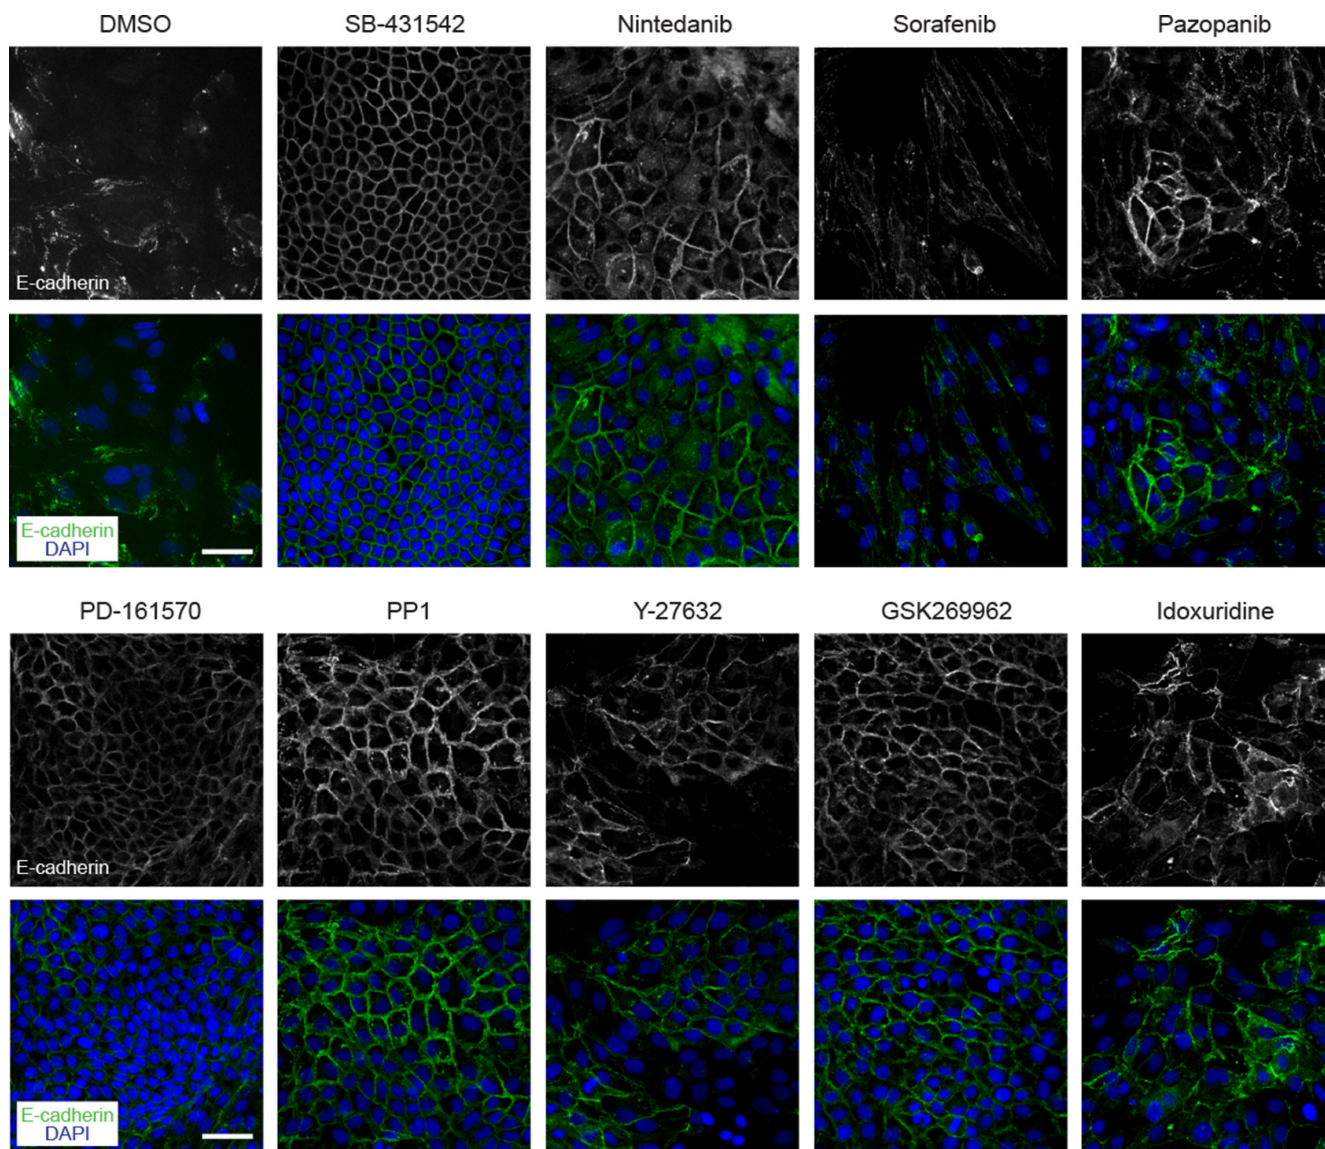

**Supplementary Figure S5: E-cadherin remains at the cell membrane after TGF $\beta$  treatment in the presence of EMT inhibitors.** NMuMG cells were treated for four days with TGF $\beta$  and either DMSO as a control or with a panel of inhibitors representing the different groups of EMT hits. E-cadherin staining was used as an epithelial marker to monitor EMT progression and the concomitant loss of adherens junctions. Cell nuclei were visualized with DAPI. SB-431542, nintedanib and sorafenib were used at 10  $\mu$ M, PD-161570 at 1  $\mu$ M, pazopanib, PP1, Y-27632 and idoxuridine at 3  $\mu$ M and GSK269962 at 10 nM concentration. Scale bar, 100  $\mu$ m.



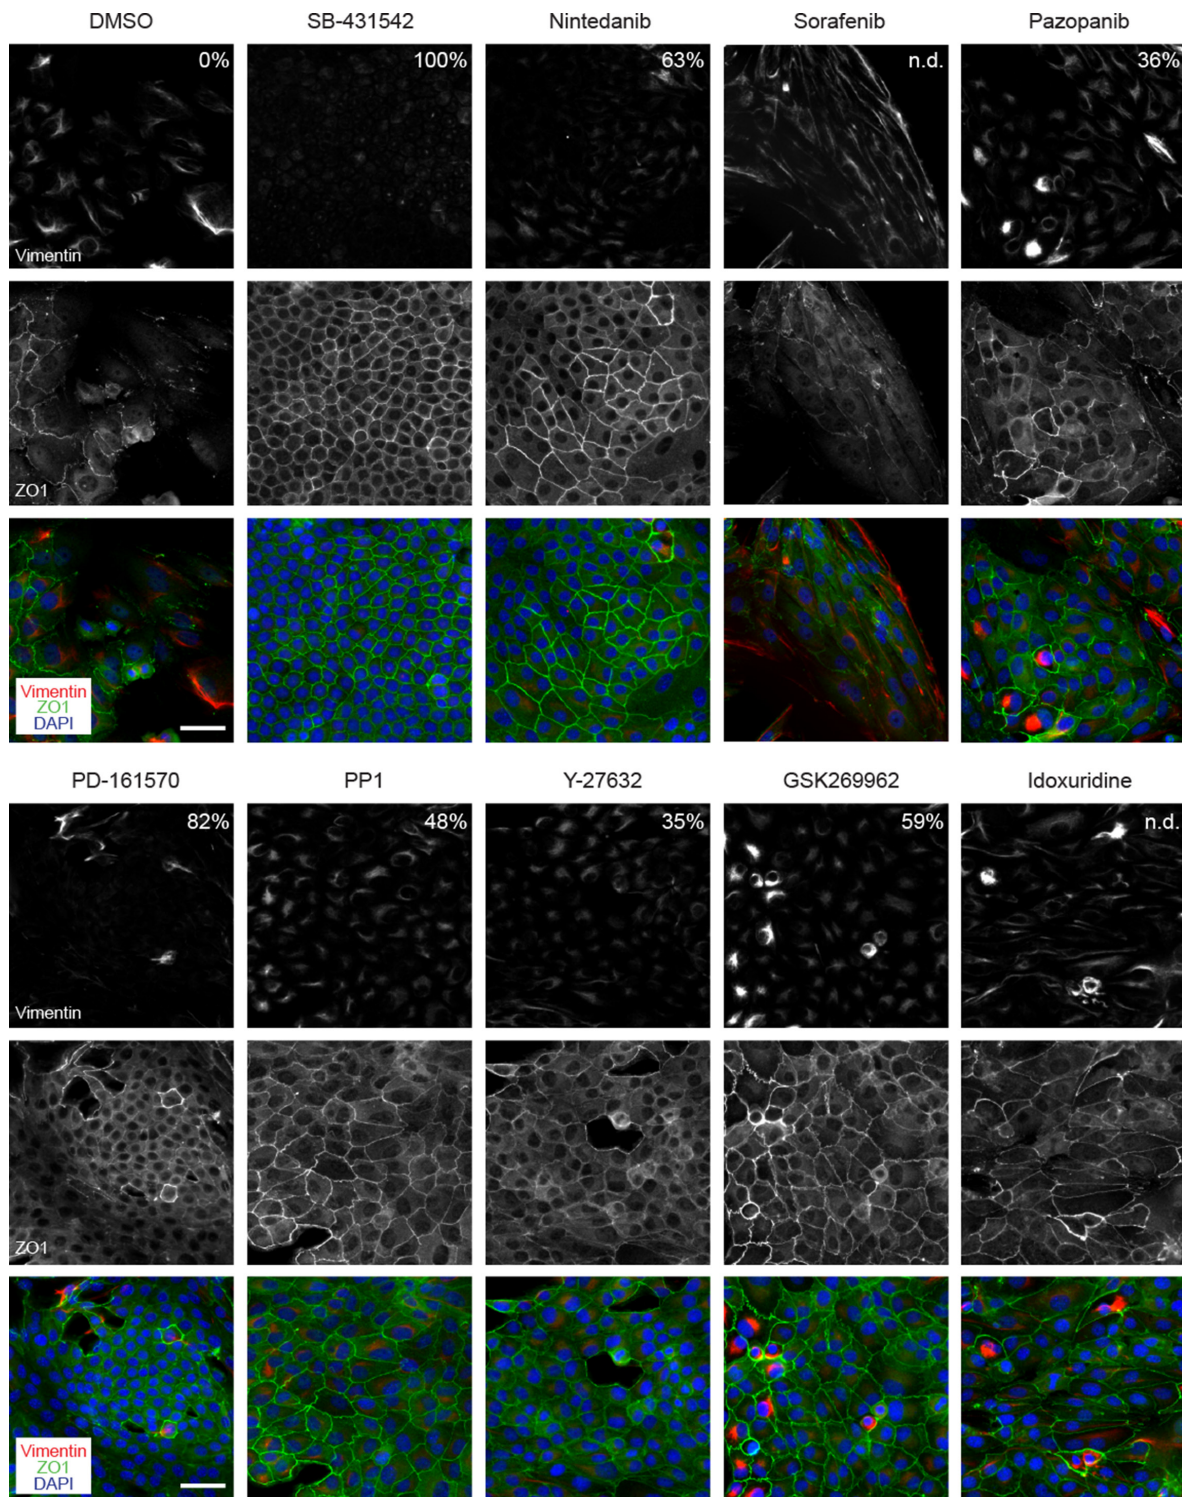

**Supplementary Figure S6: The formation of vimentin intermediate filaments and the removal of ZO1 from tight junctions is blocked by the EMT inhibitors.** NMuMG cells were treated for four days with TGF $\beta$  and either DMSO as a control or with a panel of inhibitors representing the different groups of EMT hits. ZO1 staining was used as an epithelial marker to monitor EMT progression and the concomitant loss of tight junctions while the formation of vimentin-positive intermediate filaments was used as a mesenchymal marker. Cell nuclei were visualized with DAPI. SB-431542, nintedanib and sorafenib were used at 10  $\mu$ M, PD-161570 at 1  $\mu$ M, pazopanib, PP1, Y-27632 and idoxuridine at 3  $\mu$ M and GSK269962 at 10 nM concentration. The maximal effect of the inhibitors on vimentin intermediate filament formation is indicated on the top right corner of the vimentin images. The effect on the mesenchymal DMSO control was set to 0% while 100% effect corresponds to the loss of vimentin intermediate filaments after treatment with SB-431542, the TGFBR control inhibitor. No dose-response curve on vimentin intermediate filament formation was observed with idoxuridine and sorafenib, as indicated by n.d., not determined. Scale bar, 100  $\mu$ m.

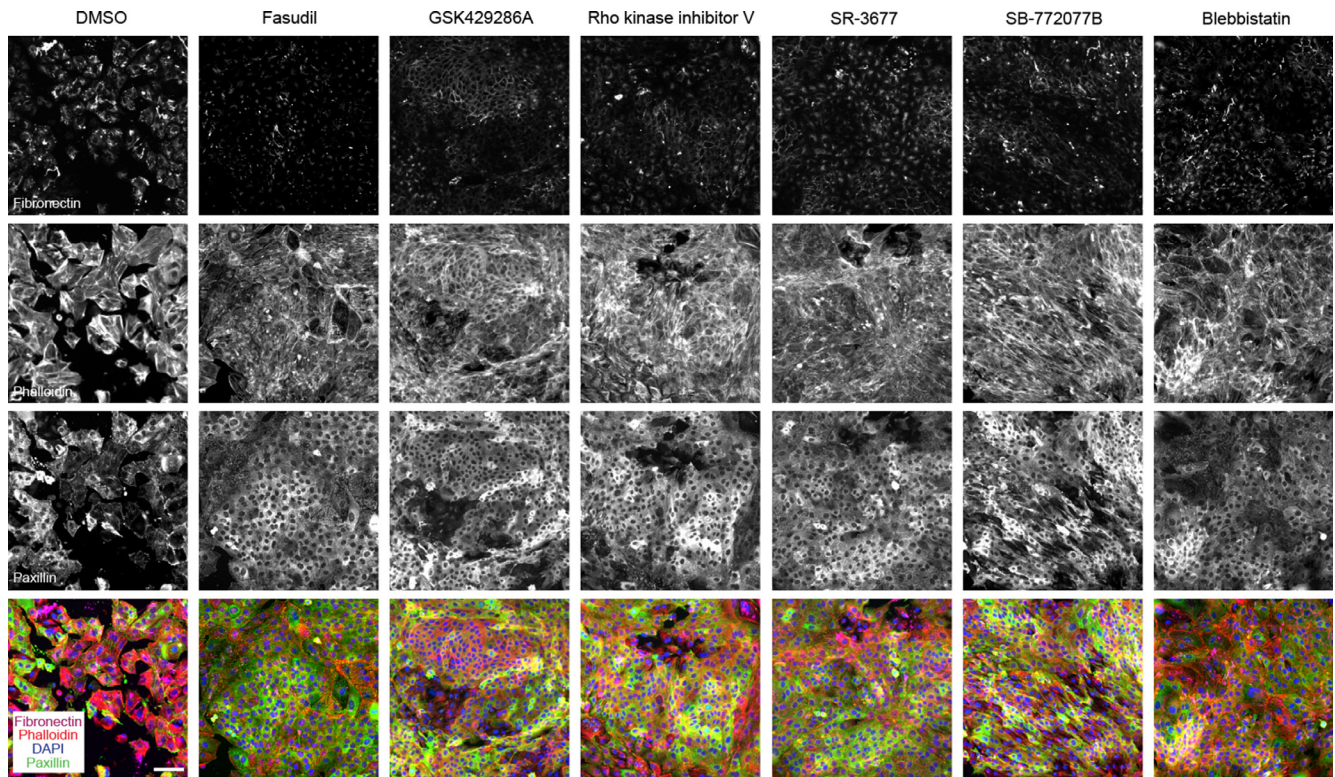

**Supplementary Figure S7: ROCK pathway inhibitors block the upregulation of fibronectin, stress fibers, focal adhesion and relieve the TGF $\beta$ -induced proliferation block.** NMuMG cells were treated and stained as described in Figure 3A. Fasudil was used at 10  $\mu$ M, GSK429286A, Rho kinase inhibitor V and SR-3677 at 0.3  $\mu$ M, SB-772077B at 0.1  $\mu$ M and blebbistatin at 5  $\mu$ M concentration. Scale bar, 100  $\mu$ m.



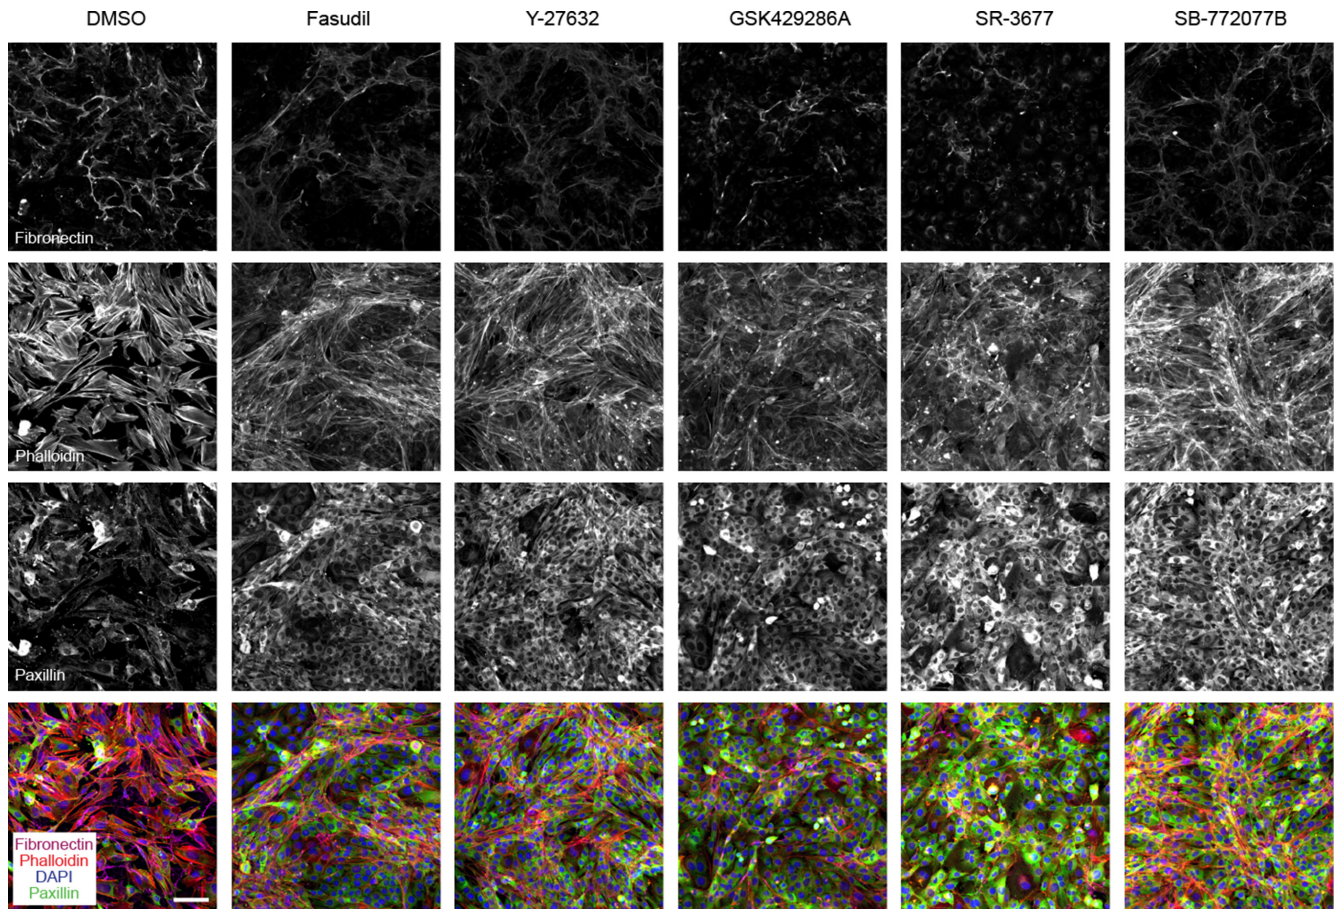

**Supplementary Figure S8: ROCK inhibitors block the upregulation of fibronectin, stress fibers and focal adhesion in Py2T cells.** Py2T cells were treated and stained as described in Figure 3A. Fasudil was used at 10  $\mu$ M, Y-27632 at 3  $\mu$ M, GSK429286A at 0.3  $\mu$ M, SR-3677 at 1  $\mu$ M and SB-772077B at 0.1  $\mu$ M concentration. Scale bar, 100  $\mu$ m.



**Supplementary Table S1: Selected list of compounds with cytotoxicity**

| Compound name                      | Reported drug targets                                          | FA/SF/FN<br>IC50 [nM] | Tox<br>IC50 [nM] | CCI<br>IC50 [nM] | Emax<br>% |
|------------------------------------|----------------------------------------------------------------|-----------------------|------------------|------------------|-----------|
| Erlotinib                          | EGFR                                                           | n.m.                  | 68.5             | n.m.             | n.m.      |
| Lapatinib                          | EGFR, HER2                                                     | n.m.                  | 133.5            | n.m.             | n.m.      |
| Gefitinib                          | EGFR                                                           | n.m.                  | 105              | n.m.             | n.m.      |
| AEE788                             | EGFR, HER2                                                     | n.m.                  | 44               | n.m.             | n.m.      |
| PP2                                | SRC family (LCK, FYN), TGFR1/2                                 | n.m.                  | 4730             | n.m.             | n.m.      |
| KX2-391                            | SRC, pretubulin                                                | n.m.                  | 15               | n.m.             | n.m.      |
| Dasatinib                          | BCR-ABL, SRC family (SRC, LCK, YES, FYN), c-KIT, EPHA2, PDGFRB | n.m.                  | 50.9             | n.m.             | n.m.      |
| PD-166326                          | c-ABL, c-SRC                                                   | n.m.                  | 9810             | n.m.             | n.m.      |
| 5-Azacytidine                      | Nucleosid Analog                                               | n.m.                  | 1259             | n.m.             | n.m.      |
| 5-Aza-2'-deoxycytidine             | Nucleosid Analog                                               | n.m.                  | 391              | n.m.             | n.m.      |
| Etoposide                          | Topoisomerase II                                               | n.m.                  | 1170             | n.m.             | n.m.      |
| Salinomycin                        |                                                                | n.m.                  | 240              | n.m.             | n.m.      |
| Abamectin                          |                                                                | n.m.                  | 9500             | n.m.             | n.m.      |
| Nigericin                          |                                                                | n.m.                  | <40              | n.m.             | n.m.      |
| Vatalanib                          | VEGFR1 (VEGFR2/3, PDGFRB, c-KIT, c-FMS)                        | n.m.                  | 10585            | n.m.             | n.m.      |
| Axitinib                           | VEGFR1/2/3, PDGFRA/B, c-KIT, (CSF-1R)                          | n.m.                  | 697              | n.m.             | n.m.      |
| Vandetanib                         | VEGFR2/3, EGFR                                                 | n.m.                  | 208              | n.m.             | n.m.      |
| Cediranib (azd2171)                | VEGFR2 (VEGFR1/3, PDGFRA/B, c-KIT, CSF-1R, FGFR1)              | n.m.                  | 967              | n.m.             | n.m.      |
| Sunitinib malate                   | PDGFRB/A, VEGFR2, c-KIT, FLT-3, CSF-1R, RET                    | n.m.                  | 5100             | n.m.             | n.m.      |
| Diphenyleneiodonium chloride (DPI) | NO synthase, NADPH oxidase                                     | n.m.                  | 453              | n.m.             | n.m.      |
| Crizotinib                         | c-MET, ALK                                                     | n.m.                  | 1715             | n.m.             | n.m.      |
| U0126                              | MEK1,2                                                         | n.m.                  | 1600             | n.m.             | n.m.      |

Compounds are selected based on their targets' or their reported role in EMT. In addition, as a comparison to the list of active compounds, cytidine analogues and receptor tyrosine inhibitors for EGFR, PDGFR and VEGFR families are shown. Listed are the compounds' name, their reported drug targets based on current literature and their effect on EMT progression as outlined in the legend of Table 1.

n.m., not measurable (no measurable effects at non-toxic concentrations).

**Supplementary Table S2: ROCK pathway inhibitors have no off-target activity on TGFBR**

| Compound name          | Reported drug targets | biochemical kinase profiling |           |           |           |           |           |           | NMuMG              |
|------------------------|-----------------------|------------------------------|-----------|-----------|-----------|-----------|-----------|-----------|--------------------|
|                        |                       | EGFR                         | FGFR1     | FGFR2     | FGFR3/4   | PDGFRA/B  | SRC       | TGFBR1/2  | EMT (FA/SF/FN)     |
|                        |                       | IC50 [nM]                    | IC50 [nM] | IC50 [nM] | IC50 [nM] | IC50 [nM] | IC50 [nM] | IC50 [nM] | combined IC50 [nM] |
| Fasudil                | ROCK1 & 2             | ia                           | ia        | ia        | ia        | ia        | ia        | ia        | 3023.3             |
| Y-27632 2HCl           | ROCK1 & 2             | ia                           | ia        | ia        | ia        | ia        | ia        | ia        | 1717.3             |
| GSK429286A             | ROCK1 & 2             | ia                           | ia        | ia        | ia        | ia        | ia        | ia        | 157.7              |
| Rho kinase inhibitor V | ROCK1 & 2             | ia                           | 2945      | 7107      | ia        | ia        | ia        | ia        | 456.7              |
| SR-3677                | ROCK1 & 2             | ia                           | ia        | ia        | ia        | ia        | ia        | ia        | 123.3              |
| GSK269962              | ROCK1 & 2             | ia                           | ia        | ia        | ia        | ia        | ia        | ia        | 3.3                |
| SB-772077B             | ROCK1 & 2             | ia                           | ia        | ia        | ia        | ia        | ia        | ia        | 44.7               |
| CAY10622               | ROCK1 & 2             | ia                           | ia        | ia        | ia        | ia        | ia        | ia        | ia                 |
| Blebbistatin           | Myosin II             | ia                           | ia        | ia        | ia        | ia        | 4370      | ia        | 3363.3             |

ROCK inhibitors and the myosin II inhibitor blebbistatin were profiled for potential off-target activity towards kinases of the EGFR, FGFR, PDGFR, SRC and TGFBR families, and the IC50 of *in vitro* inhibitory activity was compared to their IC50 for the EMT readouts. Combined IC50 for EMT parameters represents the mean of IC50 values obtained for FA, SF, FN patterns. Note that no activity towards TGFBR1 and TGFBR2 was measured.

FA, focal adhesions; SF, stress fibers; FN, fibronectin patches; ia, inactive (> 10000 nM).
